# Supplementary material for: Morphological optimization of large-area arrays of TiO2 nanowires & nanotubes for enhanced cold field emission: experiment and theory
Source: Royal Society of Chemistry journal article supplement (doi:10.1039/c5ra01558h), 2015-01-01
Supplement: c5ra01558h1.pdf [file c5ra01558h1.pdf]

## Electronic Supplementary Information

### Morphological Optimization of Large-area Arrays of the TiO<sub>2</sub> Nanowires & Nanotubes for Enhanced Cold Field Emission: Experiment and Theory

Mingi Choi, Zhuo Zhang, Jingkun Chen, Zexiang Deng and Kijung Yong\*

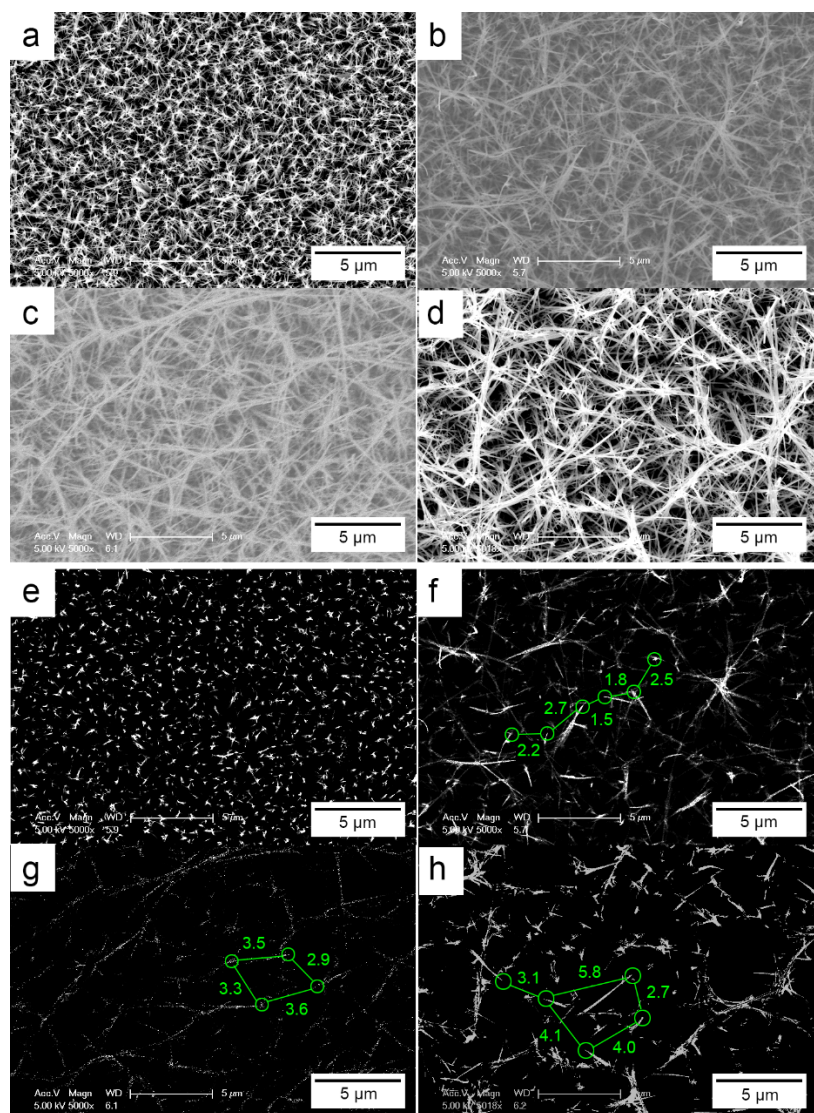

**Fig. S1** a-d) Top-view SEM images of the TiO<sub>2</sub> nanowire arrays having growth durations for 4, 8, 12 and 16 hours, respectively; e-h) Photographs taken from figure S1a-d with increased contrast and weakened brightness. The green circles mark the top-tips of the taller nanowires and the green values (μm) present the inter-distances between the neighboring circles.

Fig. S1 a-d exhibit the top-view SEM images of the TiO<sub>2</sub> nanowire arrays having growth durations for 4, 8, 12 and 16 hours, respectively. We can see that the TiO<sub>2</sub> nanowires turns more sparse with the increasing height. Although it is difficult to point out and mark the taller nanowires from their initial images, the top-tips of them become clearer when we weaken the lightness and increase the contrast of their images (Figure S1 e-h). Here, green circles are used to mark the neighboring top-tips of the taller nanowires. It should be noticed that there is no mark for the TiO<sub>2</sub> nanowires grown for 4 hours, because the taller and shorter wires are equal for this sample. For the other three samples, the inter-distance between the taller nanowires is presented by green figures. Thus, it can be seen from Figure S1 f-h that the average inter-distances are about 2, 3 and 4 μm for the nanowires grown for 8, 12 and 16 hours, respectively.

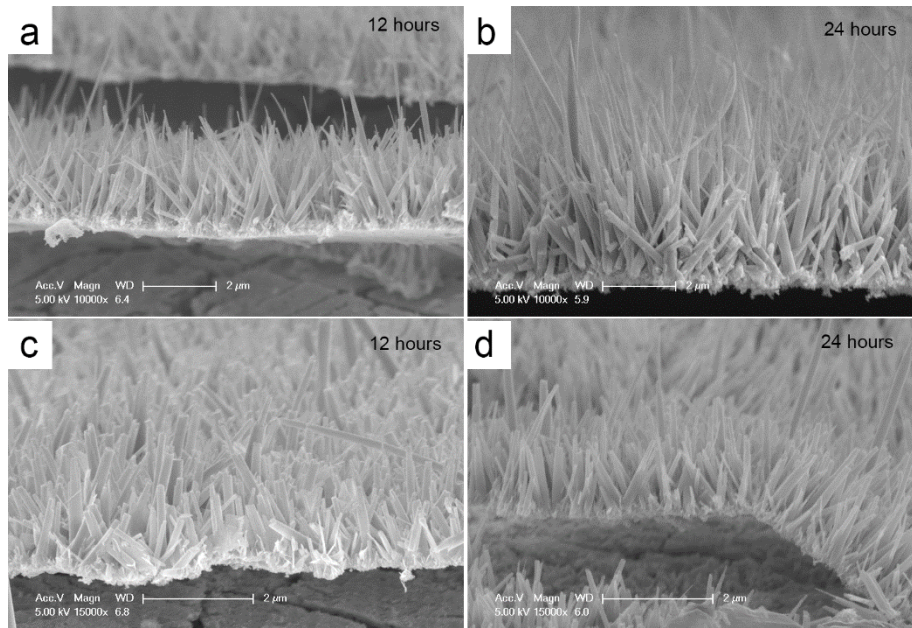

**Fig. S2** TiO<sub>2</sub> nanotube arrays grown for 12 (a and c) and 24 (b and d) hours, respectively. The upper row is side-view and the bottom row is tilted-view.

Then, for nanotubes, we can also find that the taller nanotubes became longer and sparser with the increasing growth durations (Fig. S2). Therefore, the theoretical inter-distances between the taller effective nanowires and nanotubes determined from the “ZTCD” model are well confirmed by the experiments.
